# Supplementary material for: Microphysical fingerprints in anvil cloud albedo
Source: Copernicus journal article supplement (doi:10.5194/acp-25-10907-2025), 2025-09-22
Supplement: Supplementary file 1 [file acp-25-10907-2025-supplement.pdf]

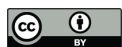

*Supplement of*

## **Microphysical fingerprints in anvil cloud albedo**

**Declan L. Finney et al.**

*Correspondence to:* Declan L. Finney ([d.l.finney@leeds.ac.uk](mailto:d.l.finney@leeds.ac.uk))

The copyright of individual parts of the supplement might differ from the article licence.

1 Introduction

This supplementary information includes figures for evaluation of additional dates and longwave/infrared evaluation of cloud morphology between satellite and model, analysis of LW effects from microphysical experiments, and individual profiles plots for crystal and snow hydrometeor species separately. It includes a table of model level hybrid heights, and a table showing conditional regressions of high cloud radiative properties and environmental factors.

Table 1. Model level hybrid heights. The true height of hybrid model levels varies with the the terrain height.

| Level | Height (m) | Level | Height (m) | Level | Height (m) |
|-------|------------|-------|------------|-------|------------|
| 1     | 5          | 25    | 2245       | 49    | 8383       |
| 2     | 22         | 26    | 2422       | 50    | 8759       |
| 3     | 45         | 27    | 2605       | 51    | 9161       |
| 4     | 75         | 28    | 2795       | 52    | 9595       |
| 5     | 112        | 29    | 2992       | 53    | 10068      |
| 6     | 155        | 30    | 3195       | 54    | 10588      |
| 7     | 205        | 31    | 3405       | 55    | 11167      |
| 8     | 262        | 32    | 3622       | 56    | 11815      |
| 9     | 325        | 33    | 3845       | 57    | 12546      |
| 10    | 395        | 34    | 4075       | 58    | 13376      |
| 11    | 472        | 35    | 4312       | 59    | 14321      |
| 12    | 555        | 36    | 4555       | 60    | 15403      |
| 13    | 645        | 37    | 4805       | 61    | 16642      |
| 14    | 742        | 38    | 5062       | 62    | 18064      |
| 15    | 845        | 39    | 5325       | 63    | 19696      |
| 16    | 955        | 40    | 5595       | 64    | 21569      |
| 17    | 1072       | 41    | 5872       | 65    | 23716      |
| 18    | 1195       | 42    | 6155       | 66    | 26175      |
| 19    | 1325       | 43    | 6445       | 67    | 28985      |
| 20    | 1462       | 44    | 6742       | 68    | 32193      |
| 21    | 1605       | 45    | 7048       | 69    | 35845      |
| 22    | 1755       | 46    | 7362       | 70    | 40000      |
| 23    | 1912       | 47    | 7688       |       |            |
| 24    | 2075       | 48    | 8027       |       |            |

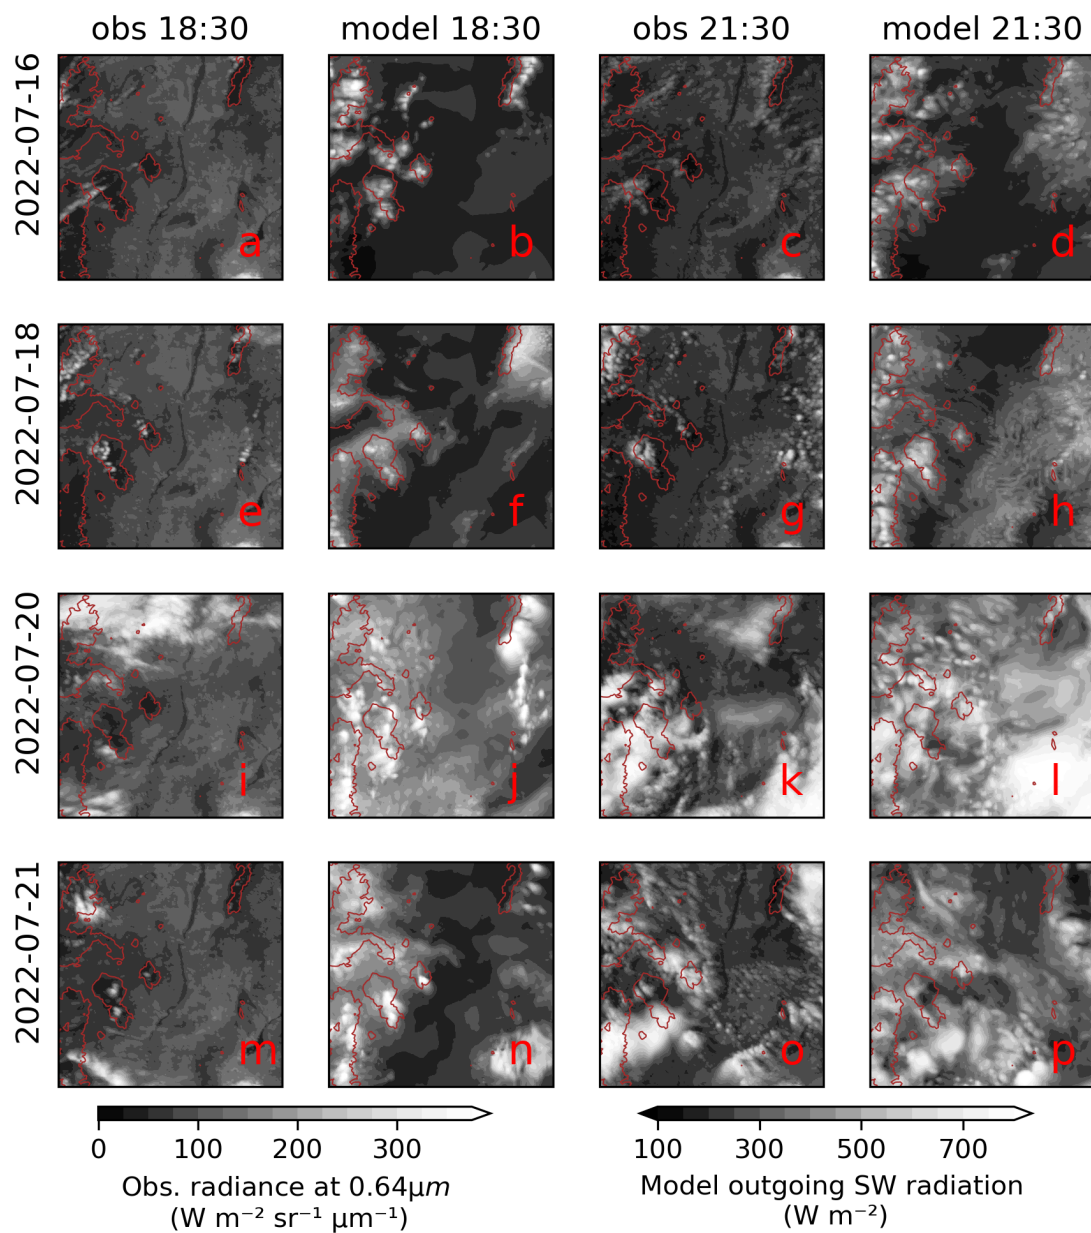

**Figure 1.** Equivalent plots to Figure 3, for cases: 16/jul/2022, 18/jul/2022, 20/jul/2022, 21/jul/2022.

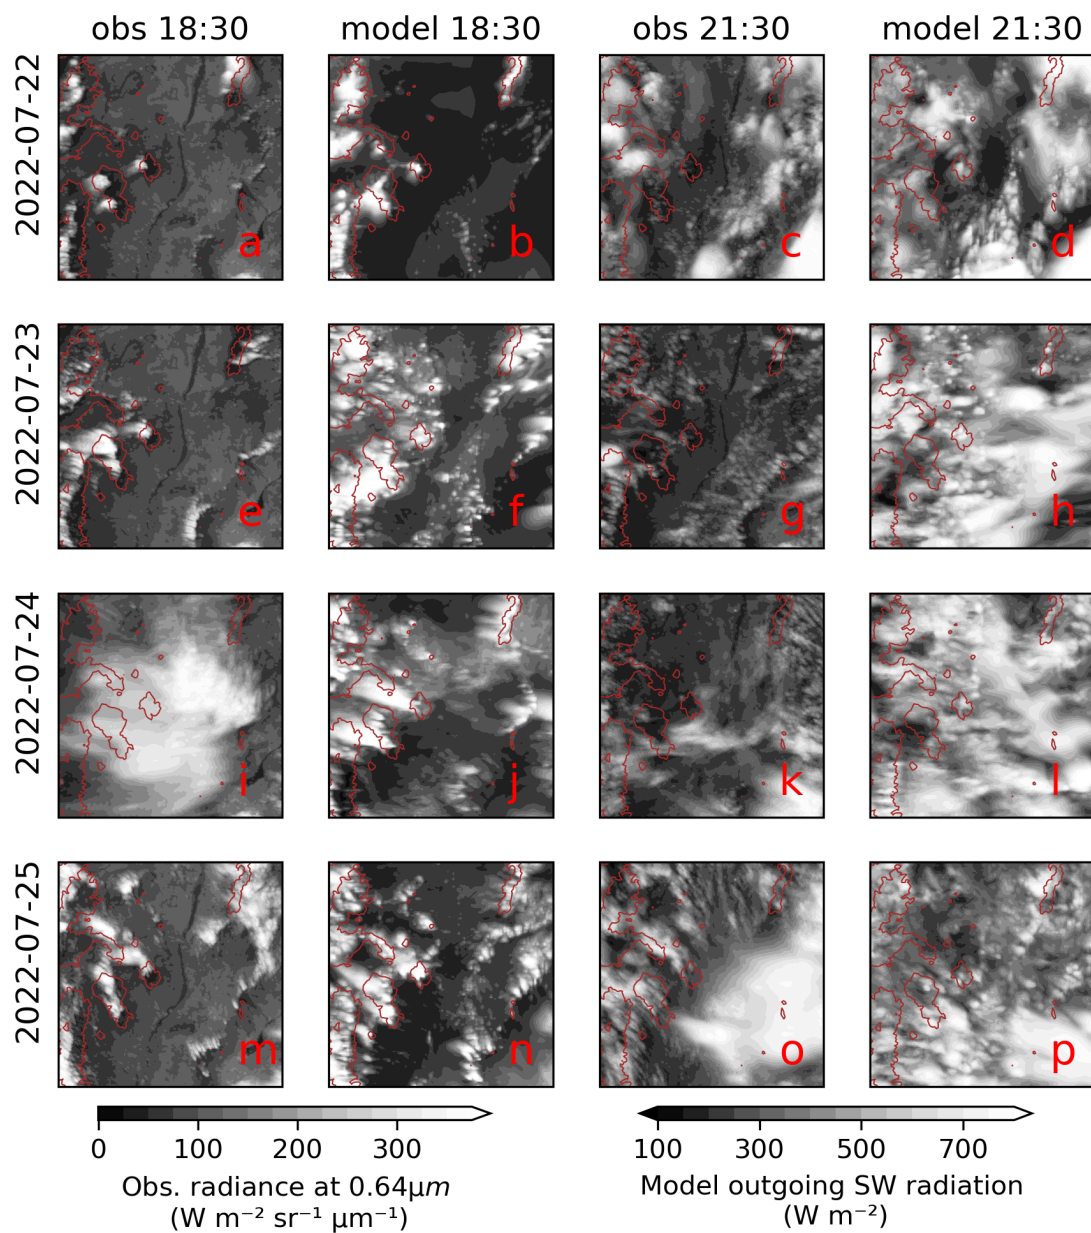

**Figure 2.** Equivalent plots to Figure 3, for cases: 22/jul/2022 to 25/jul/2022

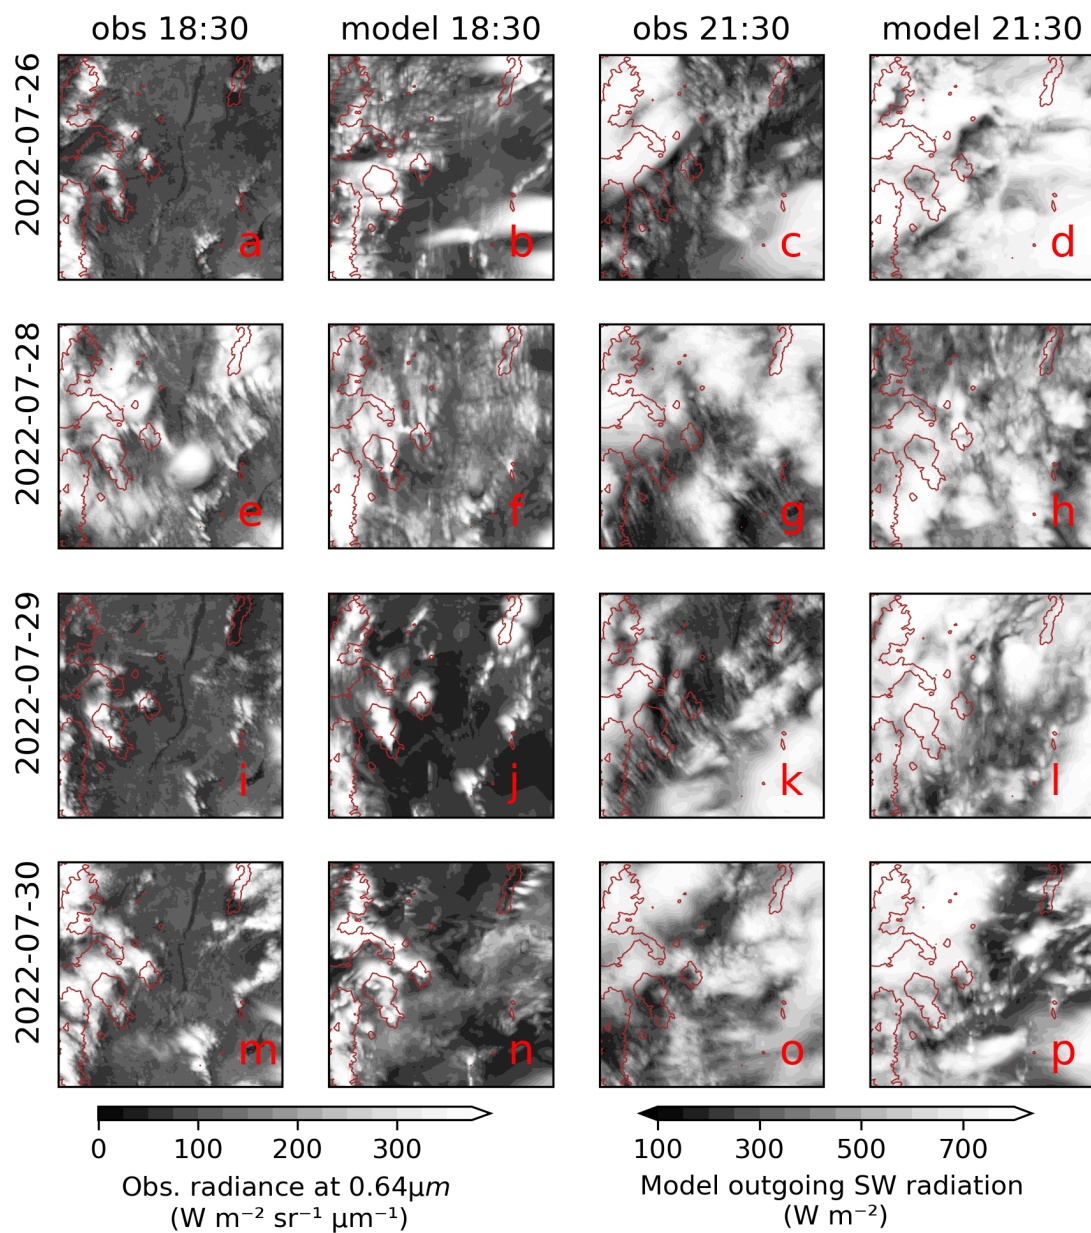

**Figure 3.** Equivalent plots to Figure 3, for cases: 26/jul/2022, 28/jul/2022, 29/jul/2022, 30/jul/2022.

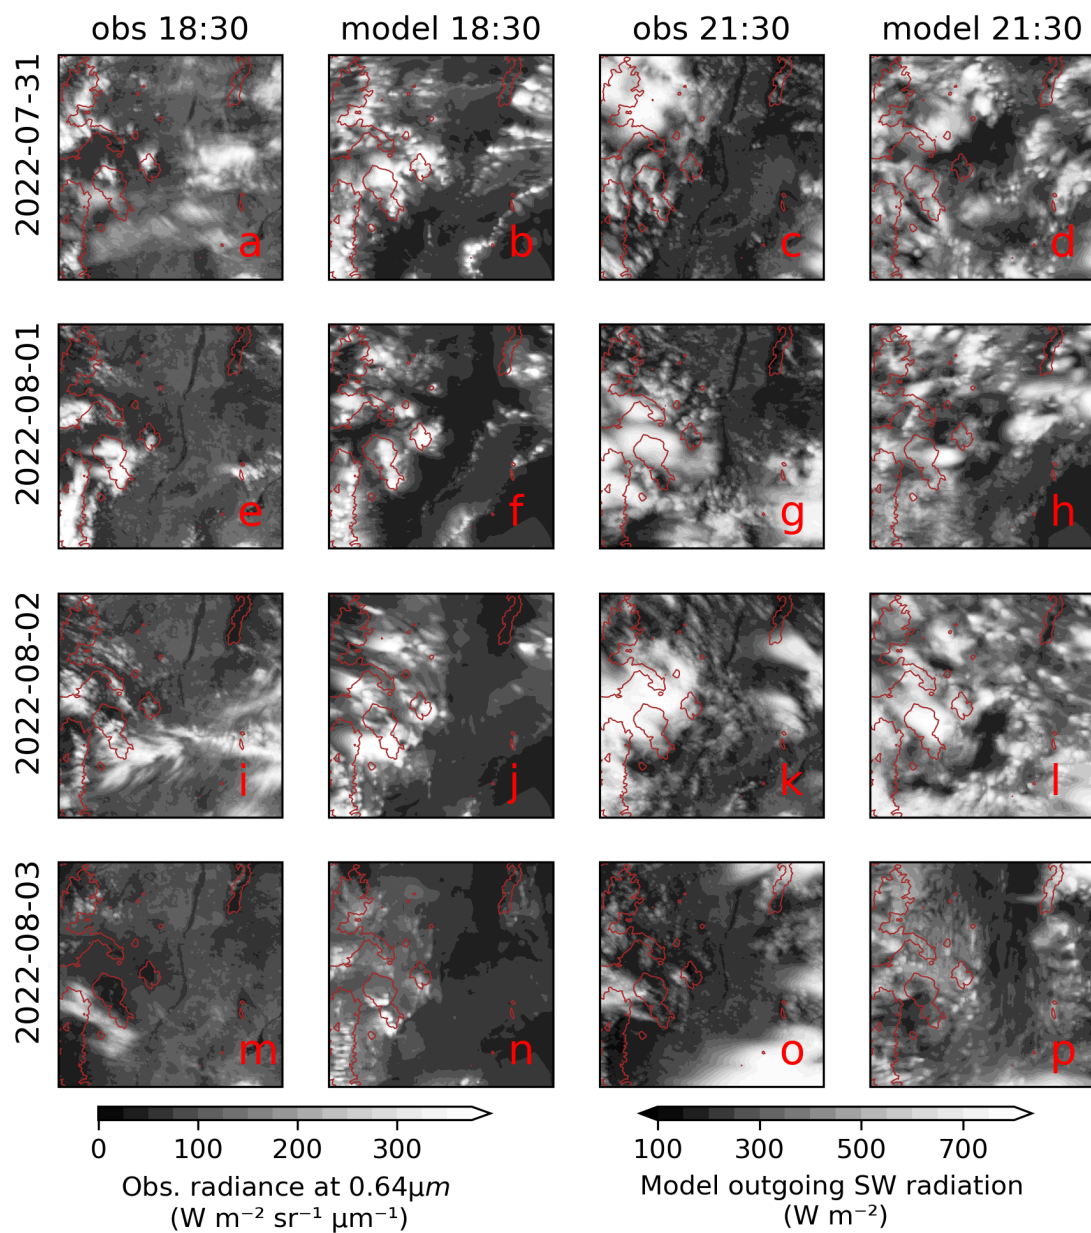

**Figure 4.** Equivalent plots to Figure 3, for cases: 31/jul/2022 to 3/aug/2022.



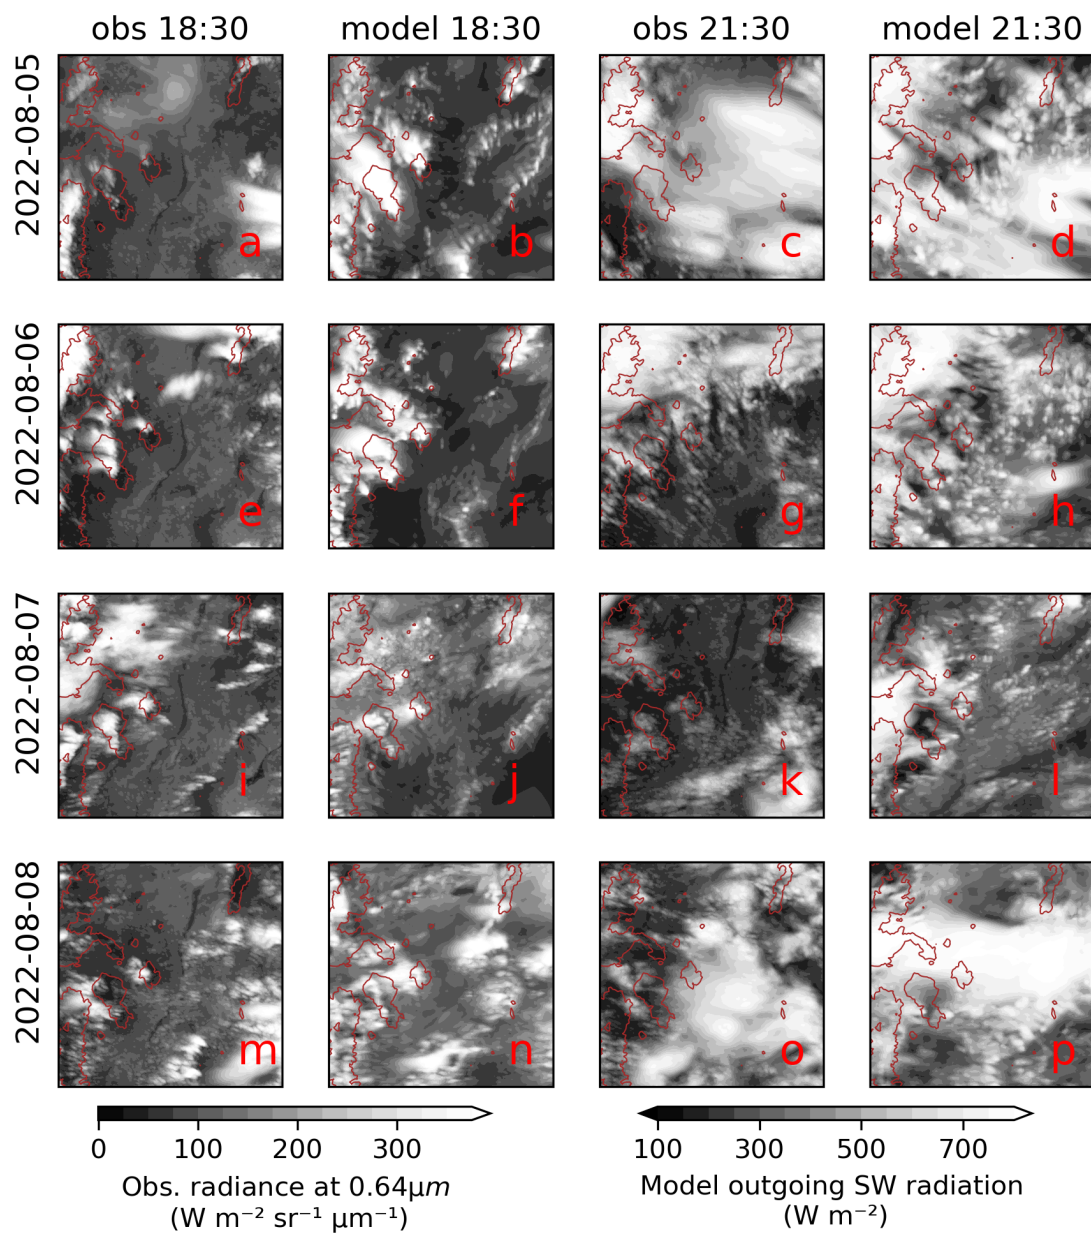

**Figure 5.** Equivalent plots to Figure 3, for cases: 5/aug/2022 to 8/aug/2022.

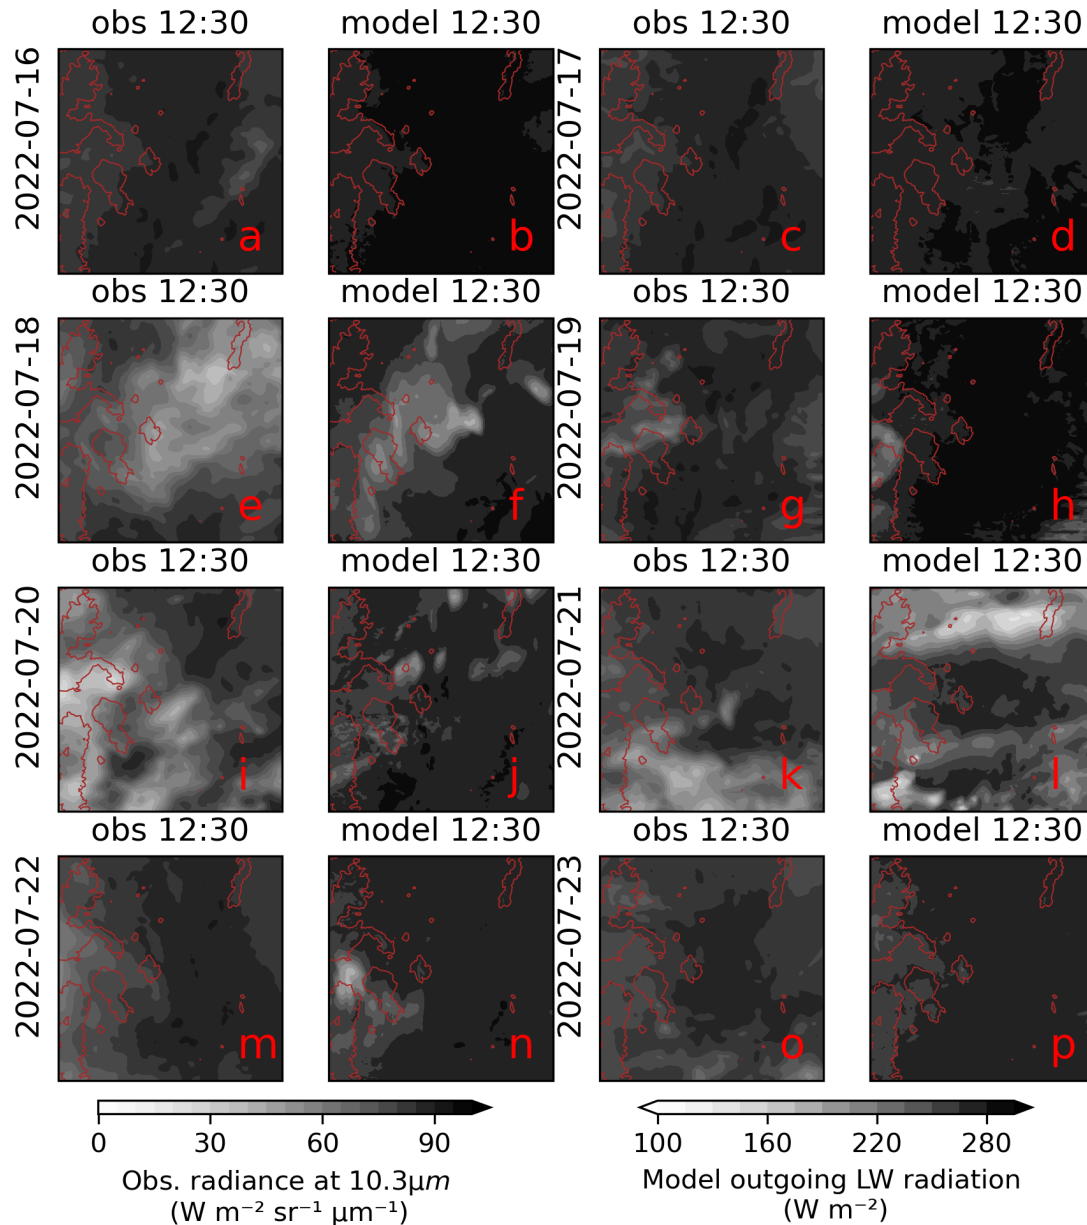

**Figure 6.** Equivalent plots to Figure 3 but using GOES channel 13 infrared radiance for obs, model outgoing LW radiation, and GOES channel 13 which measures infrared radiance. Only a single time, 12:30 UTC, is shown, allowing for two dates to be shown per row of subplots. This figure includes cases: 16/jul/2022 - 23/jul/2022.



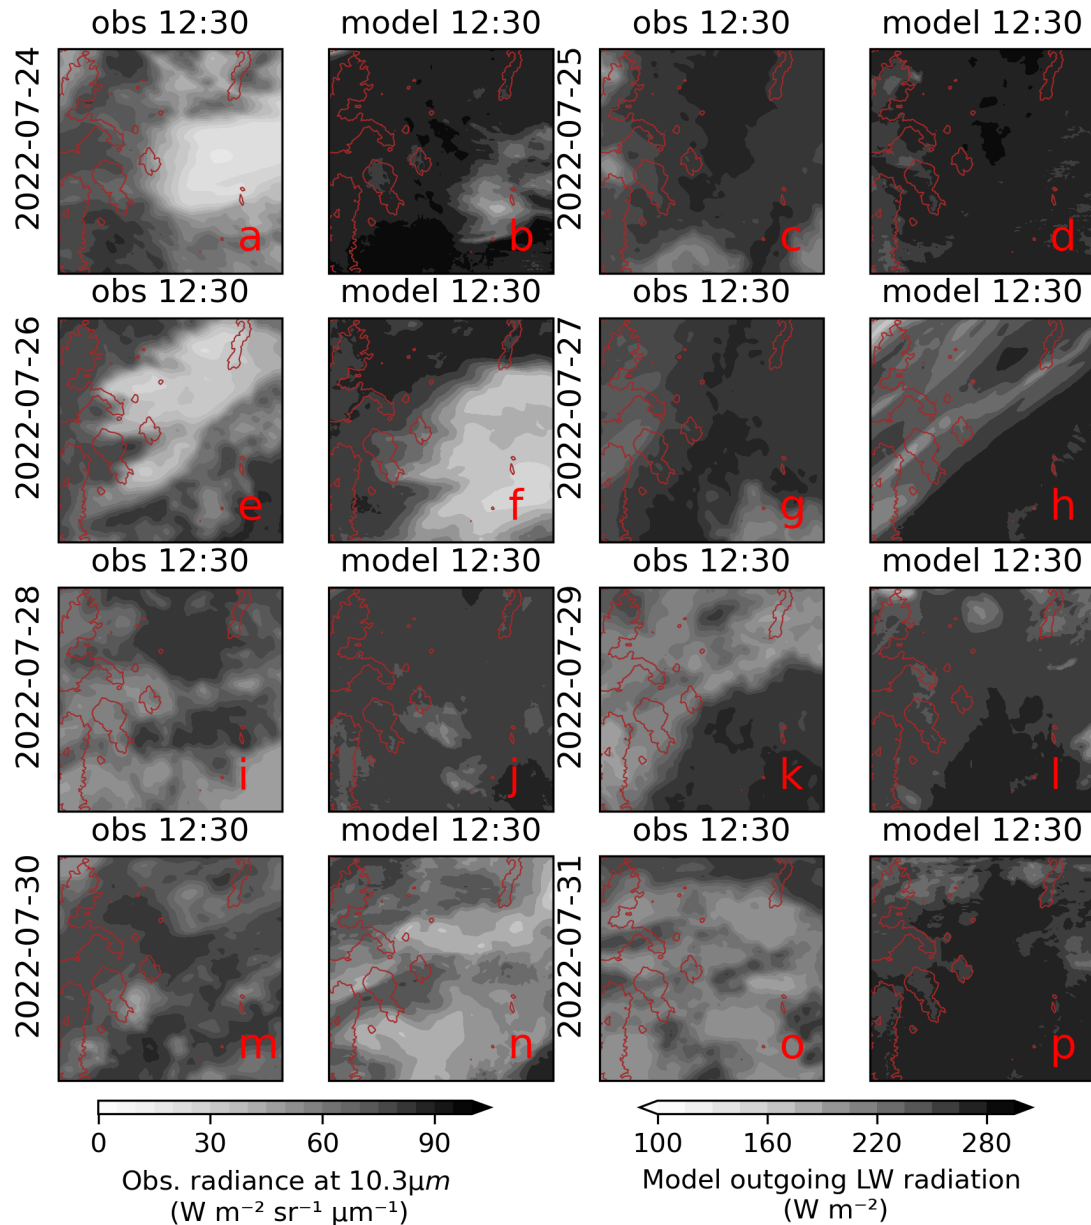

**Figure 7.** Equivalent plots to Figure 3 but using GOES channel 13 infrared radiance for obs, model outgoing LW radiation, and GOES channel 13 which measures infrared radiance. Only a single time, 12:30 UTC, is shown, allowing for two dates to be shown per row of subplots. This figure includes cases: 24/jul/2022 - 31/jul/2022.

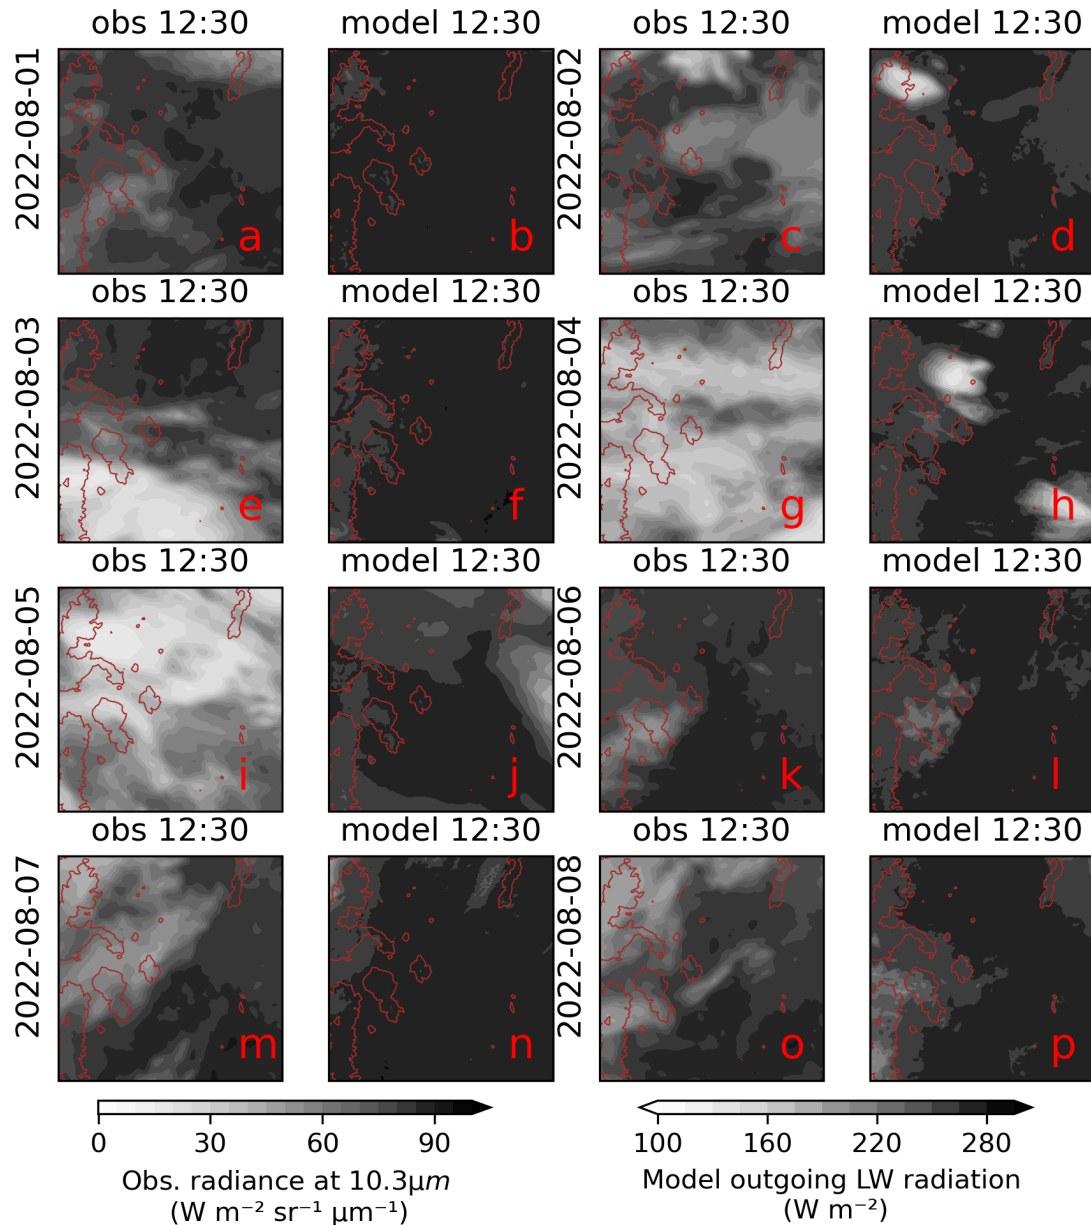

**Figure 8.** Equivalent plots to Figure 3 but using GOES channel 13 infrared radiance for obs, and model outgoing LW radiation, and GOES channel 13 which measures infrared radiance. Only a single time, 12:30 UTC, is shown, allowing for two dates to be shown per row of subplots. This figure includes cases: 01/aug/2022 - 08/aug/2022.

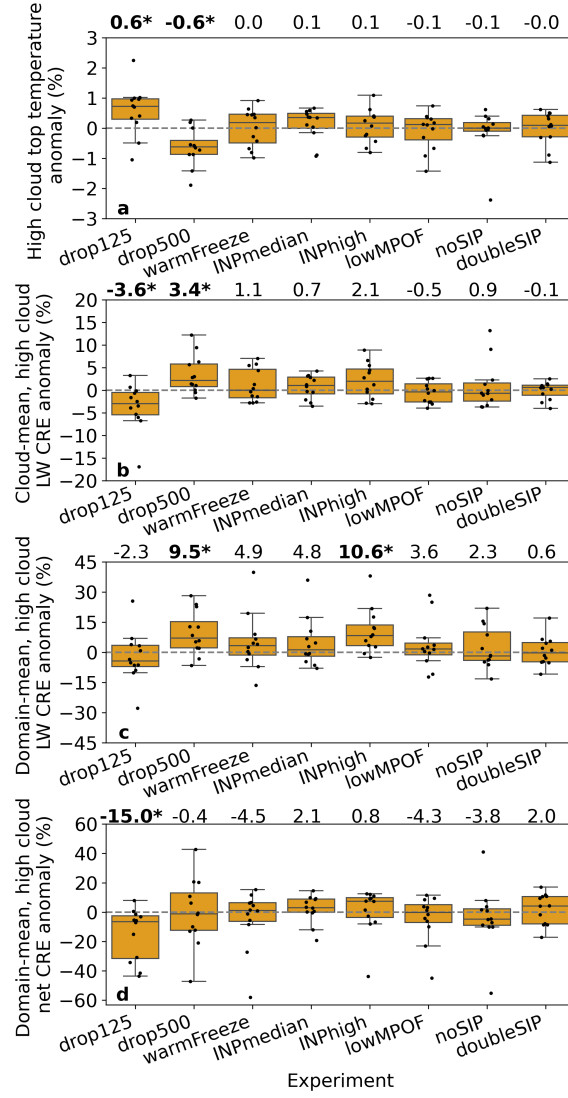

**Figure 9.** Equivalent to Figure 6 but showing percentage anomaly of high cloud top temperature, high cloud mean LW CRE, domain-mean high cloud LW CRE, and domain-mean high cloud net CRE. Mean and standard deviation of the control experiment absolute values across cases for each of panels a-d are  $220 \pm 3.9$  K,  $77 \pm 6.6$  W m<sup>-2</sup>,  $29 \pm 11$  W m<sup>-2</sup> and  $-23 \pm 11$  W m<sup>-2</sup> respectively.

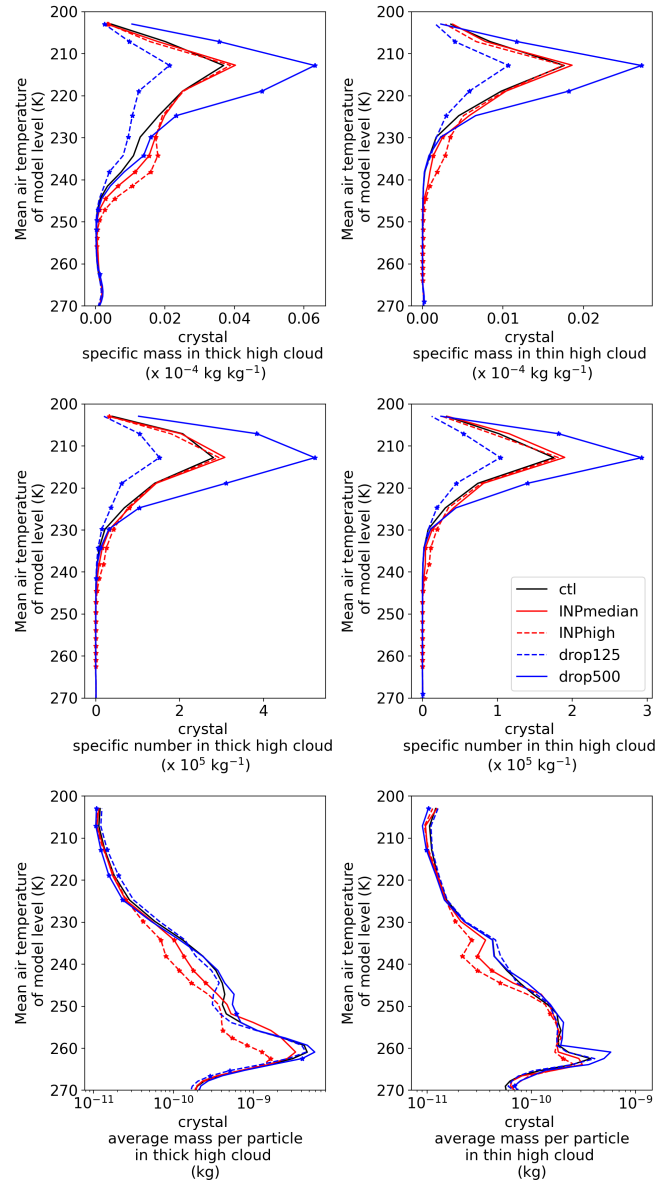

**Figure 10.** Equivalent plots to Figure 8 but for crystal hydrometeors only.

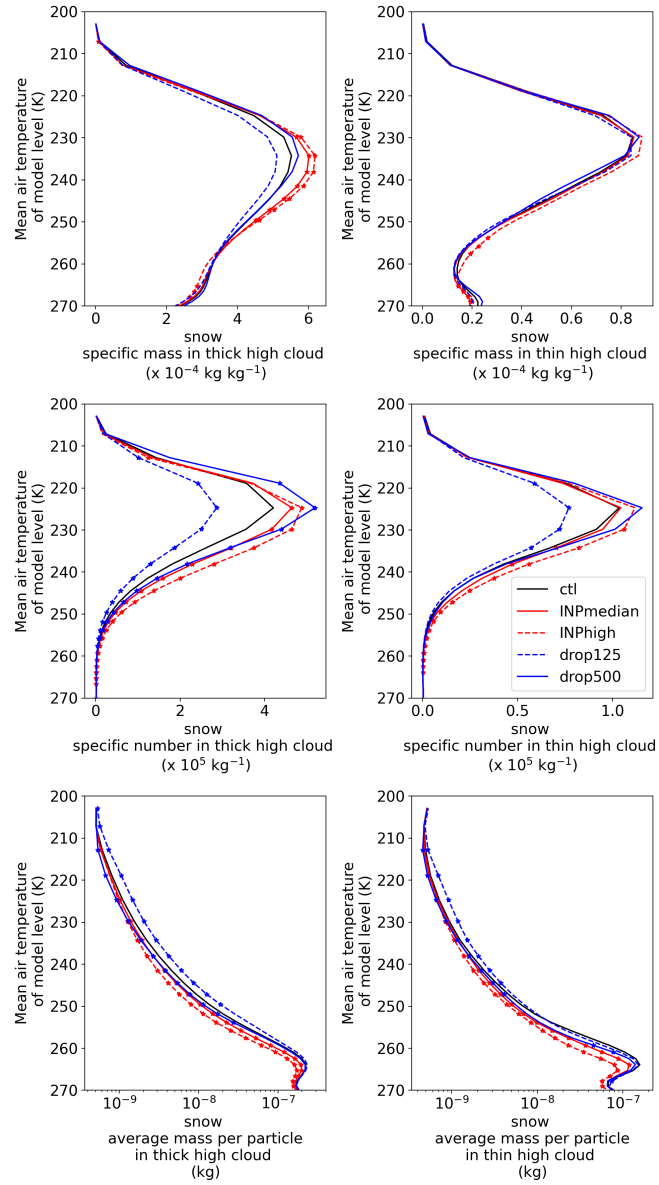

**Figure 11.** Equivalent plots to Figure 8 but for snow hydrometeors only.



**Table 2.** Equivalent to Table 2, but applying a condition of high cloud fraction greater than or equal to 5% before calculating the regression statistics.

| Feature(s)            | Albedo            |               | Cloud area  |               | Approx. daily SW CRE |                   |
|-----------------------|-------------------|---------------|-------------|---------------|----------------------|-------------------|
|                       | model             | obs           | model       | obs           | model                | obs               |
| R700                  | <b>0.45</b> * (+) | 0.58 * (+)    | 0.02        | 0.22 * (+)    | 0.16 * (-)           | <b>0.42</b> * (-) |
| CAPE                  | 0.17 * (+)        | 0.69 * (+)    | -0.06       | 0.05          | -0.03                | 0.24 * (-)        |
| V200                  | -0.05             | -0.05         | 0.06        | -0.05         | 0.10                 | -0.05             |
| SUT                   | 0.12              | 0.31 ** (+)   | 0.02        | -0.05         | 0.18 ** (-)          | 0.02              |
| R700, CAPE            | 0.42 *            | 0.73 *        | 0.00        | 0.19          | 0.18                 | 0.39 *            |
| R700, V200            | 0.42 *            | 0.56 *        | <b>0.11</b> | 0.18          | <b>0.34</b> *        | 0.40 *            |
| R700, SUT             | 0.45 *            | 0.62 *        | -0.01       | <b>0.26</b> * | 0.23 *               | 0.40 *            |
| CAPE, SUT             | 0.40 *            | 0.70 *        | -0.04       | 0.03          | 0.20                 | 0.19              |
| R700, CAPE, V200      | 0.39 *            | 0.72 *        | 0.07        | 0.14          | 0.33 *               | 0.37 *            |
| R700, CAPE, SUT       | 0.42 *            | <b>0.74</b> * | -0.06       | 0.22          | 0.18                 | 0.37 *            |
| R700, CAPE, V200, SUT | 0.39 *            | 0.73 *        | 0.01        | 0.17          | 0.31                 | 0.34 *            |
